# Supplementary material for: Thermo-Mechanical Behavior of Poly(ether ether ketone): Experiments and Modeling
Source: MDPI journal article supplement (doi:10.3390/polym13111779), 2021-05-28
Supplement: s1 [file s1]

Supplementary material

Thermo-mechanical behavior of poly(ether ether ketone):  
experiments and modeling

A.D. Drozdov and J. deClaville Christiansen

Department of Materials and Production

Aalborg University

Fibigerstraede 16, Aalborg 9220, Denmark

## **S-1 Accuracy of fitting observations**

To assess the ability of the model to describe observations on PEEK specimens, experimental data in selected tensile tests, relaxation tests and creep tests (at temperatures  $T = 20$  and  $170$  °C) are presented with error bars (indicating standard deviations of measurements on different specimens) together with results of numerical analysis. Figs. S-1 to S-4 demonstrate good agreement between the data and results of simulation, which implies that the model predicts adequately observations of PEEK specimens.

## S-2 Supplementary figures

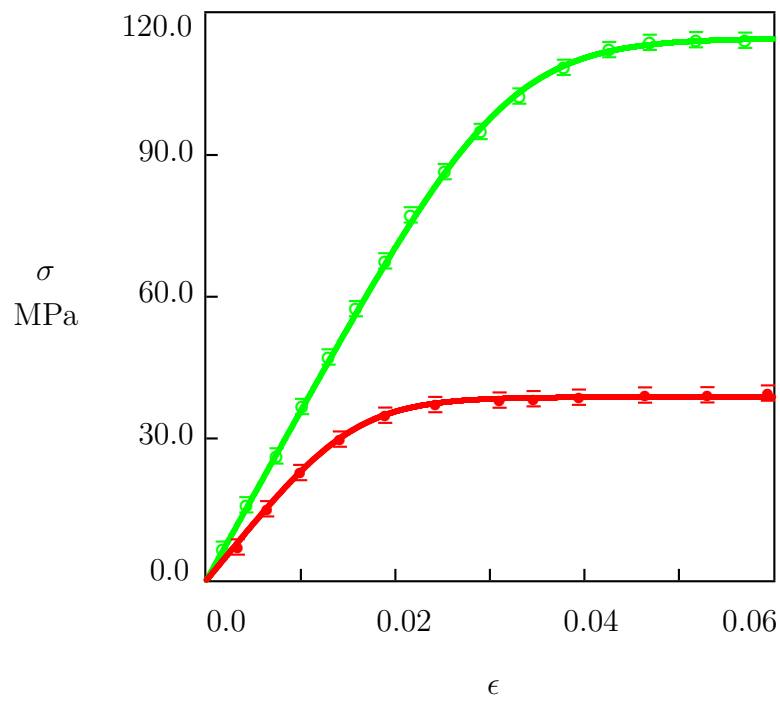

Figure S1: Stress  $\sigma$  versus strain  $\epsilon$ . Symbols: experimental data in tensile tests at temperatures  $T = 20$  ( $\circ$ ) and  $170$  ( $\bullet$ ) °C. Bars stand for the standard deviations. Solid lines: results of simulation.

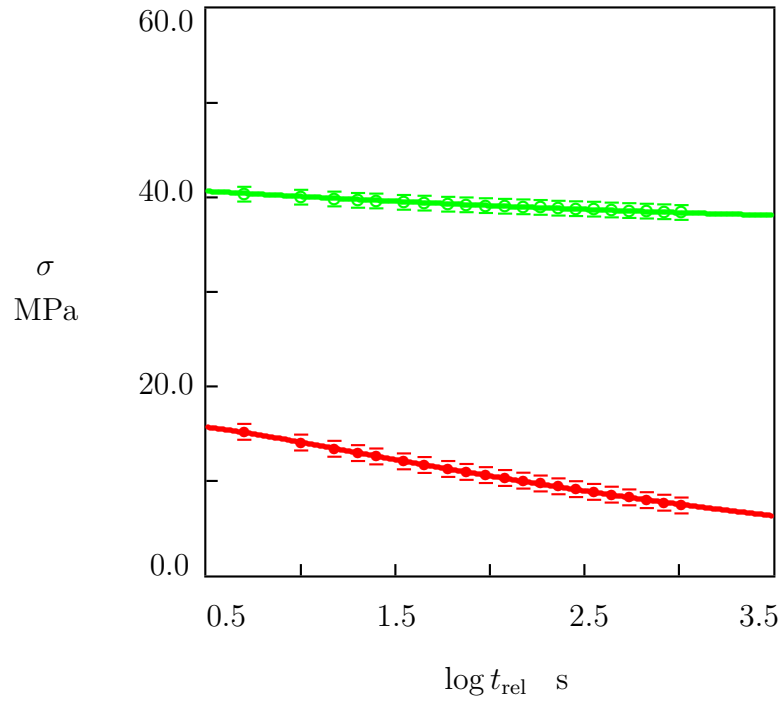

Figure S2: Stress  $\sigma$  versus relaxation time  $t_{\text{rel}}$ . Symbols: experimental data in tensile relaxation tests with strain  $\epsilon_0 = 0.01$  at temperatures  $T = 20$  ( $\circ$ ) and  $170$  ( $\bullet$ )  $^\circ\text{C}$ . Bars stand for the standard deviations. Solid lines: results of simulation.

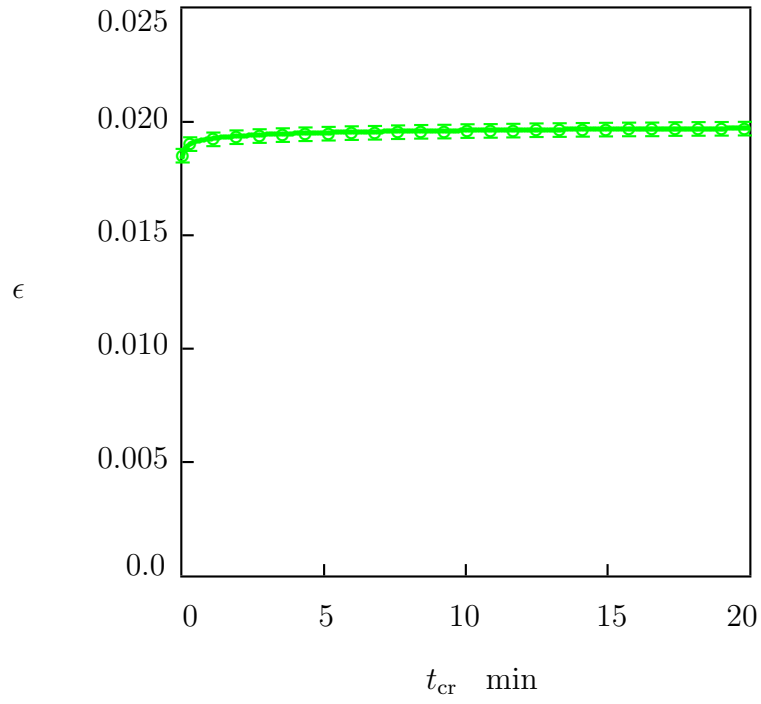

Figure S3: Strain  $\epsilon$  versus creep time  $t_{cr}$ . Circles: experimental data in creep test with stress  $\sigma_0 = 70.0$  MPa at temperature  $T = 20$  °C. Bars stand for the standard deviations. Solid line: results of simulation.

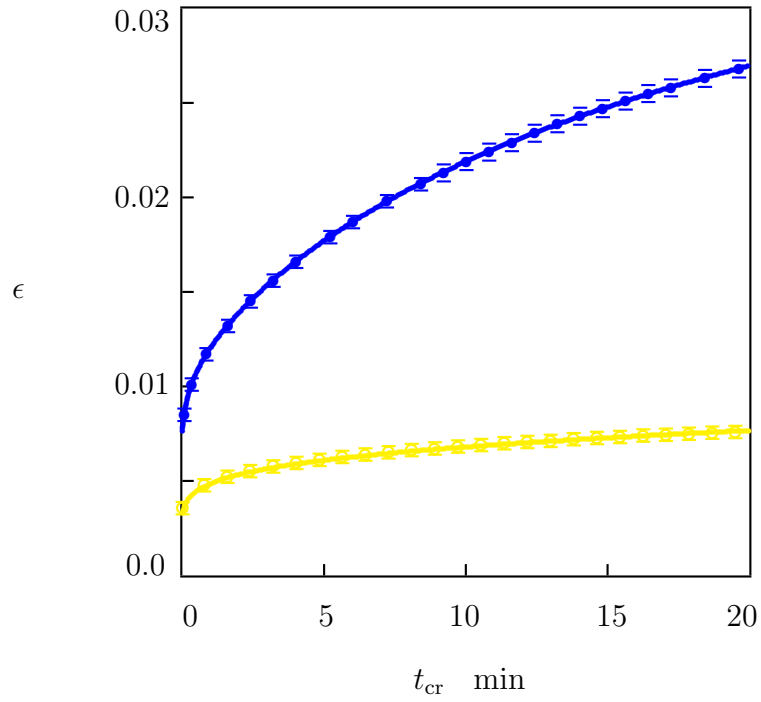

Figure S4: Strain  $\epsilon$  versus creep time  $t_{cr}$ . Symbols: experimental data in creep tests with stresses  $\sigma_0 = 10$  ( $\circ$ ) and  $20$  ( $\bullet$ ) MPa at temperature  $T = 170$  °C. Bars stand for the standard deviations. Solid lines: results of simulation.
